# Supplementary material
Source: PubMed Central journal article supplement (PMC4464541)
Supplement: 97320630011248S1.pdf [file 97320630011248S1.pdf]

## Supplementary material:

**Table 1:** Docking scores of compounds against GGTase1

| Compound | Dock score |
|----------|------------|
| 297      | -7.5       |
| 298      | -7.5       |
| Curcumin | -7.3       |

**Table 2:** Docking scores of compounds against FTase

| Compound | Dock score |
|----------|------------|
| Curcumin | -7.9       |
| BNE      | -9.5       |
